# Supplementary material for: Building regulatory landscapes reveals that an enhancer can recruit cohesin to create contact domains, engage CTCF sites and activate distant genes
Source: PubMed Central journal article supplement (PMC9205769; doi:10.1038/s41594-022-00787-7), 2022-06-16
Supplement: 41594_2022_787_MOESM1_ESM.pdf [file 41594_2022_787_MOESM1_ESM.pdf]

---

**Supplementary information**

---

**Building regulatory landscapes reveals that an enhancer can recruit cohesin to create contact domains, engage CTCF sites and activate distant genes**

---

In the format provided by the authors and unedited

**Table S1. PCR Primers Sequences***Homology arms targeting constructs*

|                      |                            |
|----------------------|----------------------------|
| pos-50_Left_HA_FWD   | AACACGCTAGGTGTA CTGCC      |
| pos-50_Left_HA_REV   | ACGCACAGCTTTGACAAAAGG      |
| pos-50_Right_HA_FWD  | GGGGCCCCAGCCCTAGT          |
| pos-50_Right_HA_REV  | TGAAAGTACCATGGGCGTTGT      |
| pos0_Left_HA_FWD     | GTGTGTGTGCTGGCTGATGAC      |
| pos0_Left_HA_REV     | TGCCCCAAGGACCGCGC          |
| pos0_Right_HA_FWD    | ACGTCGGCGGTGACGGTGAAG      |
| pos0_Right_HA_REV    | GTCACCGAGCTGCAAGAACTC      |
| posMin0_Left_HA_FWD  | GCATGGATGTCCAGTGATACA      |
| posMin0_Left_HA_REV  | TACACCTCCAATTGACTCAAATG    |
| posMin0_Right_HA_FWD | AGGTGTACCTGTGGATGTATTT     |
| posMin0_Right_HA_REV | AGACCACAGTTTCAGCGCA        |
| pos11_Left_HA_FWD    | CATGAGAGCCCACCCCTATTC      |
| pos11_Left_HA_REV    | AGGAGGGGACAGAAAAGCAAATC    |
| pos11_Right_HA_FWD   | CCCCTTGGTTCAGAATGTCA       |
| pos11_Right_HA_REV   | TGTACGGACTTCATGCCAGG       |
| pos47_Left_HA_FWD    | TAGGTCACTCCCTCCATCCTC      |
| pos47_Left_HA_REV    | CAGGAGCTGACTGGGGACT        |
| pos47_Right_HA_FWD   | AAGTAGCTACCAACCCAGGC       |
| pos47_Right_HA_REV   | AACAAAACCTTATGAGGTCCATCAAT |
| pos100_Left_HA_FWD   | CCAACATTCCCAGAACCAAAC      |
| pos100_Left_HA_REV   | CTGAAAACGGTGAGGTTTCTG      |
| pos100_Right_HA_FWD  | GGAGGTTAAATTTGCCACT        |
| pos100_Right_HA_REV  | GGTCCCTAGAGTTCTGTGTCCAC    |
| pos407_Left_HA_FWD   | TTTTCCACCTGCATCTGCCT       |
| pos407_Left_HA_REV   | ACCCTGTTGTCTACCTAGAGAGG    |
| pos407_Right_HA_FWD  | TGGGGAAACACTGAGTAATGGT     |
| pos407_Right_HA_REV  | CCATCCCATGGGCTTGCTAT       |
| dsRed_Left_HA_FWD    | AGCACTCACATCTTGCCACT       |
| dsRed_Left_HA_REV    | AGGGGCCCACTGAAGAG          |
| dsRed_Right_HA_FWD   | AGGGGAGGAAGTGAGAGACA       |
| dsRed_Right_HA_REV   | GTTCAGCATGGACTAGGGGG       |

*human 3x CTCF*

|                  |                                   |
|------------------|-----------------------------------|
| CTCF_STAM_A2_FWD | AGAGCGAGATTCCGTCTCAA              |
| CTCF_STAM_A2_REV | AGGACAAGCAACAATGGCTGGCCCATAGTA    |
| CTCF_STAM_A4_FWD | TGGGCCAGCCATTGTTGCTTGCCTTCCTCCTGT |
| CTCF_STAM_A4_REV | CCTGCAAACCTGAACTCCTGACCCCTCACAA   |
| CTCF_STAM_E2_FWD | TCAGGAGTTCAGTTTGCAGGTGGCTTGACT    |
| CTCF_STAM_E2_REV | TTTGATTTCTTCACTCTGGAA             |

*Genotyping primers*

|             |                           |
|-------------|---------------------------|
| uLCR_FWD    | CAAGGTTTCACTCTGCTGTC      |
| uLCR_REV    | TGAATGAGGCTTGAGTACAG      |
| 3xhCTCF_FWD | TCTAGATTAGACATAGGCAAGCACA |
| 3xhCTCF_REV | TCTGCCACTGCCTAGTTGAG      |
| 3xmCTCF_FWD | TGTCCAACAGAAGATCTTACCACA  |
| 3xmCTCF_REV | CTAGTGTGGGCATCGTCCAG      |

|                       |                               |
|-----------------------|-------------------------------|
| dsRed_FWD             | CCCCTAAGCTATCAGGTTGATTGA      |
| dsRed_REV             | AGCAATAGCATCACAAATTTCAACA     |
| pos-50_Left_HA_FWD    | GCATTATTCATAATAGCACATCTCAATTC |
| pos-50_Right_HA_REV   | TGGCACAGCTATATCTAAGGCG        |
| pos-50_noInsert_FWD   | GCATTATTCATAATAGCACATCTCAATTC |
| pos-50_noInsert_REV   | TGGCACAGCTATATCTAAGGCG        |
| posMin0_Left_HA_FWD   | CAGGACAGGGGATGAGCTT           |
| posMin0_noInsert_FWD  | TCCGAGAATTCCAGAAAATGATG       |
| posMin0_noInsert_REV  | ACCTCCCCCTGAACCTGAA           |
| pos0_Left_HA_FWD      | GTATTTACCACTGGATAAGTG         |
| pos0_Right_HA_REV     | AGCTTACCATGACCGAGTAC          |
| Pos0_noInsert_FWD     | TCCTGTGTAAAGCTGGATCC          |
| Pos0_noInsert_REV     | ACTTCAACTGTAGGCGTCTC          |
| pos11_Left_HA_FWD     | GCTCTGGCTCCGTAGAAGTTG         |
| pos11_Right_HA_REV    | TGGGCACGTGATGGGAGATA          |
| Pos11_noInsert_FWD    | CTCAACATGCCCTCTCCTG           |
| Pos11_noInsert_REV    | TTTGAAGCTGAGGAGCGACA          |
| pos47_Left_HA_FWD     | TTGGAATTCTCAGTTCCATCACA       |
| pos47_Right_HA_REV    | ACTGAGGGGAGGCTTTTAACT         |
| Pos47_noInsert_FWD    | TCCCCAATTCTGCAGGTTC           |
| Pos47_noInsert_REV    | GGCCAGTCTCAGTGGTTCAT          |
| pos100_Left_HA_FWD    | CTAAGAGAAACAAACGCCAAC         |
| pos100_Right_HA_REV   | AAGATGAATTGAAAGGAGGTC         |
| Pos100_noInsert_FWD   | CAGCATCACTGGCCTAACCT          |
| Pos100_noInsert_REV   | CTCTTCTGCCACCAGGCTAT          |
| pos407_Left_HA_FWD    | TCATACCAACAGGATCACAAAACA      |
| pos407_Right_HA_REV   | TGACTGATTCAACAGGGTGCTTT       |
| Pos407_noInsert_FWD   | TCATACCAACAGGATCACAAAACA      |
| Pos407_noInsert_REV   | TGACTGATTCAACAGGGTGCTTT       |
| posdsRed_Left_HA_FWD  | TGGCTGAAATAGGGCAGCAT          |
| posdsRed_Right_HA_REV | CGTCACTTACATTTTCCACTGC        |
| small_domain_FWD      | CCCCTAAGCTATCAGGTTGATTGA      |
| small_domain_REV      | TCCTTACTGTAGCCTGTGGA          |

*ChIP-qPCR*

|                          |                          |
|--------------------------|--------------------------|
| SMC1_pos_control_FWD     | CTGAAGATCCCCTGTGCGACC    |
| SMC1_pos_control_REV     | ACTACCCAAGGGGATCGAAGC    |
| H3K27me3_pos_control_FWD | TCCAGATGTGCAGTCGTGTT     |
| H3K27me3_pos_control_FWD | TGGCCACACTTTGGAGTTCA     |
| Left_boundary_FWD        | TGAAACTTGTGGACATGCCTTATC |
| Left_boundary_REV        | AAGAAGTGCATTGTGGGATGGAA  |
| 3xhCTCF_FWD              | TTCAGTCTTTAGCGCCACC      |
| 3xhCTCF_REV              | GTCAAGCCACCTGCAAACCTG    |
| 3xmCTCF_FWD              | CTCTTCTGCTCCACCTGCAA     |
| 3xmCTCF_REV              | AGCCTTAGAGAGGGGTCCAG     |
| 3'GFP_FWD                | CTACCCTCTCTGAGAAAACCTCC  |
| 3'GFP_REV                | CCTGTGCTTCTGCTAGGATCAA   |
| HBG1_promoter_FWD        | TTCAGGGTCAGCTTGCCGTA     |
| HBG1_promoter_REV        | ACACTCGCTTCTGGAACGTC     |

*4C primers Ectopic viewpoints*

|             |                             |
|-------------|-----------------------------|
| GFP_FWD     | GGGGCACAAGCTGGAGTA          |
| GFP_REV     | GCTCCTGGACGTAGCCTTC         |
| uLCR_FWD    | TTTAATATGCTTTAAGTTCTGGGGTAC |
| uLCR_REV    | CTGACCCCGTATGTGAGCA         |
| 3xhCTCF_FWD | GGAATCTCGCTCTGATCGTC        |
| 3xhCTCF_REV | TGCAGGTGGCTTGACTG           |
| 3xmCTCF_FWD | ATTCTCTGCTAGTGTGGGCATC      |
| 3xmCTCF_REV | GACCCCTCTCTAAGGCTGACA       |

*4C primers Endogenous viewpoints*

|                   |                            |
|-------------------|----------------------------|
| Left_boundary_FWD | ATCAAAAATGAGTGAAAGGT       |
| Left_boundary_REV | CTAGTTGCTTCGTGTGTTCA       |
| Pos0_FWD          | TTGGCGGCTGCAAGATAC         |
| Pos0_REV          | AGACCCCAAACCTCCGATT        |
| Pos11_FWD         | GGAAACCTCAGGACTAGGCAT      |
| Pos11_REV         | CCCTGATGGTATCGCTGAAT       |
| Pos47_FWD         | AAGGAGAACAAGGCCTTCAGTA     |
| Pos47_REV         | TCCTCCAACCAGCACTCATAG      |
| Pos100_FWD        | ACAGGGTCTCACTCTGTGGAG      |
| Pos100_REV        | TTACATTTATATGTGCACAGCAAGTC |
| Pos407_FWD        | GGGGTTTCCAGGCAAGTA         |
| Pos407_REV        | TTGCCATTTCACCAAGGTC        |

**Table S2. oligos for sgRNA cloning***For targeting regulatory elements*

|                       |                           |
|-----------------------|---------------------------|
| pos-50_upper          | caccgTCAAAGCTGTGCGTCAAGTT |
| pos-50_lower          | aaacAACTTGACGCACAGCTTTGAc |
| 3'GFP_cut#1_upper     | caccgTACCTGTGGATGTATTTCAA |
| 3'GFP_cut#1_lower     | aaacTTGAAATACATCCACAGGTAg |
| GFP_middle_upper      | aaacCGGCGCGGGTCTTGTAGTTGc |
| GFP_middle_lower      | caccgAGCACTGCACGCCGTAGGTC |
| 3'GFP_cut#2_upper     | caccGTCAATTGGAGGTGTACCTG  |
| 3'GFP_cut#2_lower     | aaacCAGGTACACCTCCAATTGAC  |
| pos0_upper            | caccgCACCGTCACCGCCGACGTCG |
| pos0_lower            | aaacCGACGTCGGCGGTGACGGTgC |
| pos11_upper           | caccgTTCTGAACCAAAGGGGTGCC |
| pos11_lower           | aaacGGCACCCCTTTGGTTCAGAAc |
| pos47_upper           | caccGGTAGCTACTTCTATAGAGC  |
| pos47_lower           | aaacGCTCTATAGAAGTAGCTACC  |
| pos100_upper          | caccGAAACCTCACCGTTTTcAGG  |
| pos100_lower          | aaacCCTGAAACGGTGAGGTTTC   |
| pos407_upper          | caccGGTAGACAACAGGGTACTTG  |
| pos407_lower          | aaacCAAGTACCCTGTTGTCTACC  |
| posdsRed_upper        | caccgCCCCTGATTTGGTGCATGGC |
| posdsRed_lower        | aaacGCCATGCACCAAATCAGGGGc |
| E407_downstream_upper | caccgATTCATTGGCCTCTCCGTTT |
| E407_downstream_lower | aaacAAACGGAGAGGCCAATGAATc |
| dsRed_upstream_upper  | caccgTGACTTTGGGGTCTAGAAT  |
| dsRed_upstream_lower  | aaacATTCTAGACCCCCAAAGTCAc |
| Right_boundary_upper  | caccgAATTTTCACAAAATTCGGAC |
| Right_boundary_lower  | aaacGTCCGAATTTTGTGAAAATTc |

*For KRAB silencing*

|                          |                                          |
|--------------------------|------------------------------------------|
| sg_non-targeting_Control | ttgGTGCACCCGGCTAGGACCGGgtttaagagc        |
| sg_non-targeting_Control | ttagctcttaaacCCGGTCTAGCCGGGTGCACcaacaag  |
| sg_SMC1A_upper           | ttgGGCCGTACGCCGAGAACTGgtttaagagc         |
| sg_SMC1A_lower           | ttagctcttaaacCAGTTCTCGGGCGTACGGCCcaacaag |
| sg_SMC3_upper            | ttgGGGAGCGAGCGGCGCTTTGGgtttaagagc        |
| sg_SMC3_lower            | ttagctcttaaacCCAAAGCGCCGCTCGCTCCcaacaag  |
| sg_RAD21_upper           | ttgGAAGGAGGCGCCGGCTGTGGgtttaagagc        |
| sg_RAD21_lower           | ttagctcttaaacCCACAGCCGGCGCCTCCTTcaacaag  |
| sg_MED21_upper           | ttgGGTTTGTGCGGTAGGAACAggtttaagagc        |
| sg_MED21_lower           | ttagctcttaaacTGTTCCTACCGCAGCAAACcaacaag  |
| sg_GATA1_upper           | ttgGTGAGCTTGCCACATCCCCAggtttaagagc       |
| sg_GATA1_lower           | ttagctcttaaacTGGGGATGTGGCAAGCTCACcaacaag |

# Supplementary Information Figure 1

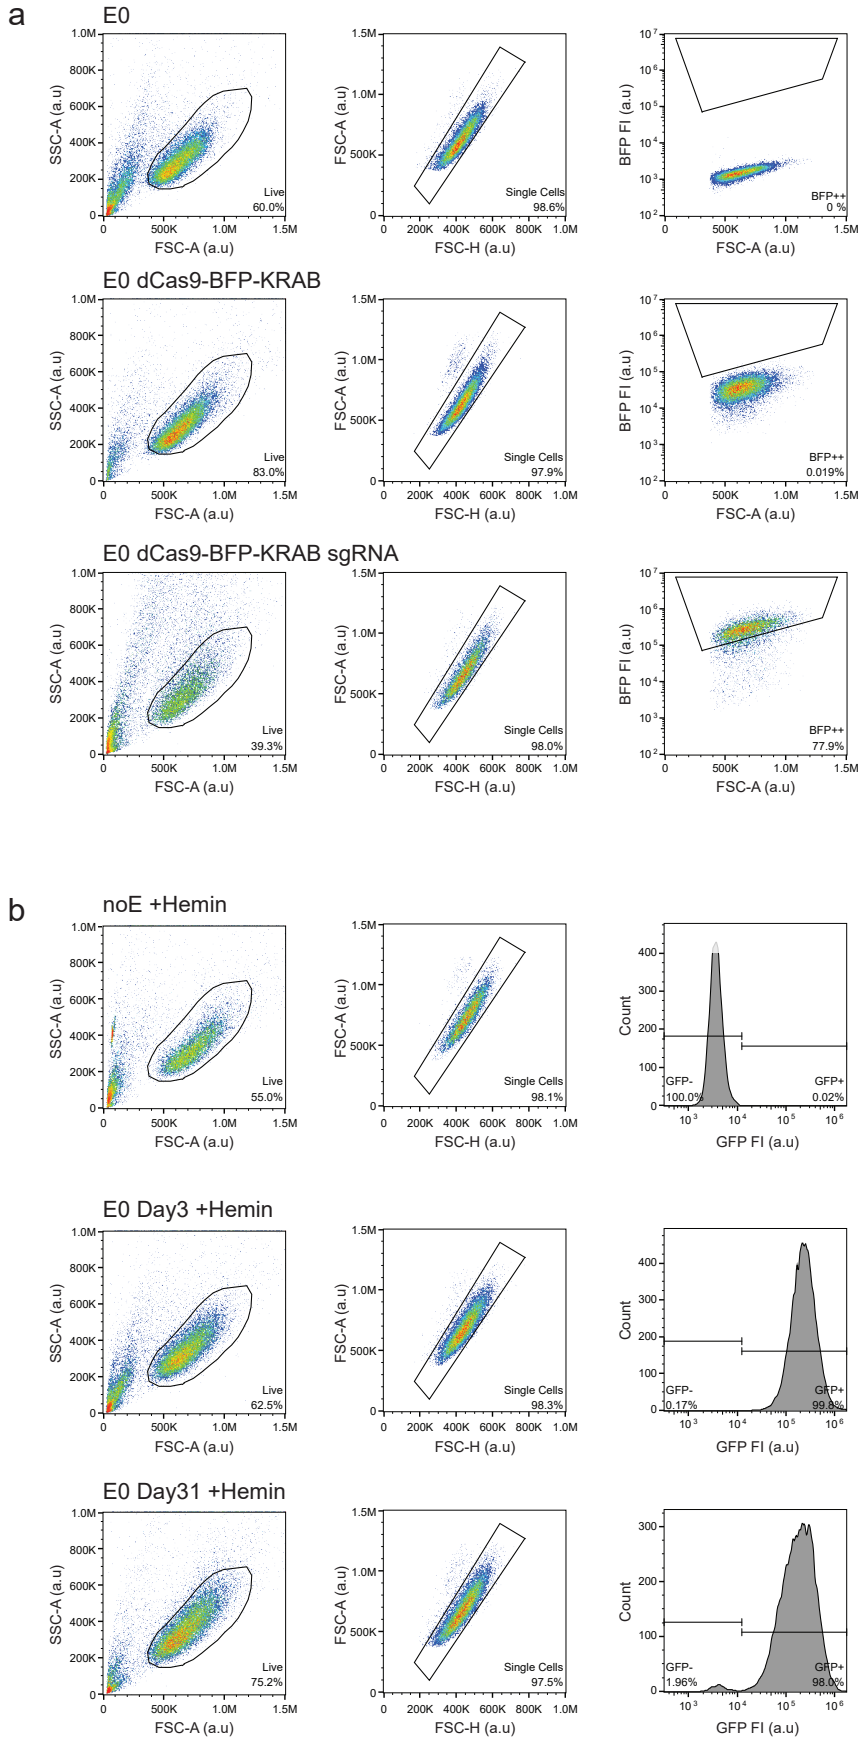

## Supplementary Information Fig. 1 | Gating strategy for flow cytometry analysis

**a.** Gating strategy for GFP FI analysis of cells without (top) and with knockdown of a given factor (middle and bottom row). From left to right: Cells were gated for live (FSC-A and SSC-A), single cell (FSC-A and FSC-H) and for BFP. Top row shows E0, middle row E0 dCas9::KRAB and lower row shows E0 dCas9-BFP-KRAB transduced with a lentiviral vector carrying the sgRNA and a BFP expression cassette. Note that dCas9-KRAB gives intermediate BFP expression levels, while the introduction of the sgRNA-BFP vector yields high BFP expression levels (BFP++); BFP++ gating was based on E0 dCas9::KRAB.

**b.** Gating strategy for silencing experiments. From left to right: Cells were gated for live (FSC-A and SSC-A) and single cell (FSC-A and FSC-H) and percentage of GFP+ cells was quantified (right). Top row: noE. Middle row: E0. Bottom row: E0, 31 days after sort. GFP-gating is based on noE, showing that ~2% of the cells became GFP-negative.
