# Supplementary material for: Building regulatory landscapes reveals that an enhancer can recruit cohesin to create contact domains, engage CTCF sites and activate distant genes
Source: PubMed Central journal article supplement (PMC9205769; doi:10.1038/s41594-022-00787-7), 2022-06-16
Supplement: 41594_2022_787_MOESM2_ESM.pdf [file 41594_2022_787_MOESM2_ESM.pdf]

## Reporting Summary

Nature Portfolio wishes to improve the reproducibility of the work that we publish. This form provides structure for consistency and transparency in reporting. For further information on Nature Portfolio policies, see our [Editorial Policies](#) and the [Editorial Policy Checklist](#).

### Statistics

For all statistical analyses, confirm that the following items are present in the figure legend, table legend, main text, or Methods section.

n/a Confirmed

- The exact sample size ( $n$ ) for each experimental group/condition, given as a discrete number and unit of measurement
- A statement on whether measurements were taken from distinct samples or whether the same sample was measured repeatedly
- The statistical test(s) used AND whether they are one- or two-sided  
*Only common tests should be described solely by name; describe more complex techniques in the Methods section.*
- A description of all covariates tested
- A description of any assumptions or corrections, such as tests of normality and adjustment for multiple comparisons
- A full description of the statistical parameters including central tendency (e.g. means) or other basic estimates (e.g. regression coefficient) AND variation (e.g. standard deviation) or associated estimates of uncertainty (e.g. confidence intervals)
- For null hypothesis testing, the test statistic (e.g.  $F$ ,  $t$ ,  $r$ ) with confidence intervals, effect sizes, degrees of freedom and  $P$  value noted  
*Give  $P$  values as exact values whenever suitable.*
- For Bayesian analysis, information on the choice of priors and Markov chain Monte Carlo settings
- For hierarchical and complex designs, identification of the appropriate level for tests and full reporting of outcomes
- Estimates of effect sizes (e.g. Cohen's  $d$ , Pearson's  $r$ ), indicating how they were calculated

*Our web collection on [statistics for biologists](#) contains articles on many of the points above.*

### Software and code

Policy information about [availability of computer code](#)

Data collection CytExpert 2.3.0.84, Bio-Rad CFX Manager 2.1

Data analysis Plots were generated in R (version 4.1.0), FlowJo 10.5.2 and GraphPad Prism 8.2.1. Sequencing was analyzed with pipeline "pipe4C" (<https://github.com/deLaatLab/pipe4C>) and custom R base code, as indicated in text.

For manuscripts utilizing custom algorithms or software that are central to the research but not yet described in published literature, software must be made available to editors and reviewers. We strongly encourage code deposition in a community repository (e.g. GitHub). See the Nature Portfolio [guidelines for submitting code & software](#) for further information.

### Data

Policy information about [availability of data](#)

All manuscripts must include a [data availability statement](#). This statement should provide the following information, where applicable:

- Accession codes, unique identifiers, or web links for publicly available datasets
- A description of any restrictions on data availability
- For clinical datasets or third party data, please ensure that the statement adheres to our [policy](#)

Public ChIP-seq and RNA-seq (mapped to human genome release 19) tracks were downloaded from ENCODE portal9. The following data-sets from ENCODE were used: K562 SMC3 ChIP-seq (Encode, Michael Snyder, ENCSR000EGW, ENCF479BWQ), ChIP-seq CTCF ChIP-seq (Encode, Bradley Bernstein, ENCSR000AKO, ENCF000BWF), K562 RNA-seq (Encode, Brenton Graveley, ENCSR000AEN, ENCF657EOD, ENCF578WIM), H3K27ac (Encode, Bradley Bernstein, GEO: GSM733656) and H3K27me3 (Encode, Michael Snyder, GEO: GSM788088).

Raw sequencing data and mapped wig files of the following experiments are available without restriction from the Gene Expression Omnibus (GEO) under accession

## Sample Technique Genotype Viewpoint Hemin Sorted KnockDown Genome Figure

Sample\_1 4C WT Pos0 no\_Hemin GFP\_negative NA hg19\_with\_insert 2a  
 Sample\_2 4C WT Pos0 no\_Hemin GFP\_negative NA hg19\_with\_insert 2a  
 Sample\_3 4C noE Pos0 no\_Hemin GFP\_negative NA hg19\_with\_insert 2c, ext. 3  
 Sample\_4 4C noE Pos0 no\_Hemin GFP\_negative NA hg19\_with\_insert 2c, ext. 3  
 Sample\_5 4C noE GFP no\_Hemin GFP\_negative NA hg19\_with\_insert 2a, 2b, 2c, 2e, 4b, 4c, 4j, ext. 2c  
 Sample\_6 4C noE GFP no\_Hemin GFP\_negative NA hg19\_with\_insert 2a, 2b, 2c, 2e, 4b, 4c, 4j, ext. 2c  
 Sample\_7 4C noE GFP no\_Hemin GFP\_negative NA hg19\_with\_insert 2a, 2b, 2c, 2e, 4b, 4c, 4j, ext. 2c  
 Sample\_8 4C E0 GFP no\_Hemin 2xGFP\_positive NA hg19\_with\_insert 1j, 2b, 2c, 3c, ext. 2a  
 Sample\_9 4C E0 GFP no\_Hemin 2xGFP\_positive NA hg19\_with\_insert 1j, 2b, 2c, 3c, ext. 2a  
 Sample\_10 4C E11 GFP no\_Hemin 2xGFP\_positive NA hg19\_with\_insert 1j, 2b, 2c, ext. 2a  
 Sample\_11 4C E11 GFP no\_Hemin 2xGFP\_positive NA hg19\_with\_insert 1j, 2b, 2c, ext. 2a  
 Sample\_12 4C E47 GFP no\_Hemin 2xGFP\_positive NA hg19\_with\_insert 1j, 2b, 2c, ext. 2a  
 Sample\_13 4C E47 GFP no\_Hemin 2xGFP\_positive NA hg19\_with\_insert 1j, 2b, 2c, ext. 2a  
 Sample\_14 4C E100 GFP no\_Hemin 2xGFP\_positive NA hg19\_with\_insert 1j, 2b, 2c, 3c, 3e, 4b, ext. 2a  
 Sample\_15 4C E100 GFP no\_Hemin 2xGFP\_positive NA hg19\_with\_insert 1j, 2b, 2c, 3c, 3e, 4b, ext. 2a  
 Sample\_16 4C E407 GFP no\_Hemin 2xGFP\_positive NA hg19\_with\_insert 1j, 2e, 2d, ext. 2a  
 Sample\_17 4C E407 GFP no\_Hemin 2xGFP\_positive NA hg19\_with\_insert 1j, 2e, 2d, ext. 2a  
 Sample\_18 4C E407 GFP no\_Hemin 2xGFP\_positive NA hg19\_with\_insert 1j, 2e, 2d, ext. 2a  
 Sample\_19 4C E00 GFP no\_Hemin 2xGFP\_positive NA hg19\_with\_insert 3c, 3d  
 Sample\_20 4C E00 GFP no\_Hemin 2xGFP\_positive NA hg19\_with\_insert 3c, 3d  
 Sample\_21 4C E00 GFP no\_Hemin 2xGFP\_positive NA hg19\_with\_insert 3c, 3d  
 Sample\_22 4C E0 uLCR no\_Hemin 2xGFP\_positive NA hg19\_with\_insert 2c, 3c, ext. 3  
 Sample\_23 4C E0 uLCR no\_Hemin 2xGFP\_positive NA hg19\_with\_insert 2c, 3c, ext. 3  
 Sample\_24 4C E00 uLCR no\_Hemin 2xGFP\_positive NA hg19\_with\_insert 3c  
 Sample\_25 4C E00 uLCR no\_Hemin 2xGFP\_positive NA hg19\_with\_insert 3c  
 Sample\_26 4C E00 uLCR no\_Hemin 2xGFP\_positive NA hg19\_with\_insert 3c  
 Sample\_27 4C EC100 GFP no\_Hemin 2xGFP\_positive NA hg19\_with\_insert 3c, 3d, 4c  
 Sample\_28 4C EC100 GFP no\_Hemin 2xGFP\_positive NA hg19\_with\_insert 3c, 3d, 4c  
 Sample\_29 4C E100 uLCR no\_Hemin 2xGFP\_positive NA hg19\_with\_insert 2c, 3c, 3e, 4b, ext. 3  
 Sample\_30 4C E100 uLCR no\_Hemin 2xGFP\_positive NA hg19\_with\_insert 2c, 3c, 3e, 4b, ext. 3  
 Sample\_31 4C EC100 uLCR no\_Hemin 2xGFP\_positive NA hg19\_with\_insert 3c, 4c  
 Sample\_32 4C EC100 uLCR no\_Hemin 2xGFP\_positive NA hg19\_with\_insert 3c, 4c  
 Sample\_33 4C EC100 uLCR no\_Hemin 2xGFP\_positive NA hg19\_with\_insert 3c, 4c  
 Sample\_34 4C C0 GFP no\_Hemin GFP\_negative NA hg19\_with\_insert 3d  
 Sample\_35 4C C0 GFP no\_Hemin GFP\_negative NA hg19\_with\_insert 3d  
 Sample\_36 4C C0 GFP no\_Hemin GFP\_negative NA hg19\_with\_insert 3d  
 Sample\_37 4C C0 CBS no\_Hemin GFP\_negative NA hg19\_with\_insert 3d  
 Sample\_38 4C C0 CBS no\_Hemin GFP\_negative NA hg19\_with\_insert 3d  
 Sample\_39 4C E00 CBS no\_Hemin 2xGFP\_positive NA hg19\_with\_insert 3d  
 Sample\_40 4C E00 CBS no\_Hemin 2xGFP\_positive NA hg19\_with\_insert 3d  
 Sample\_41 4C C100 GFP no\_Hemin GFP\_negative NA hg19\_with\_insert 3d  
 Sample\_42 4C C100 GFP no\_Hemin GFP\_negative NA hg19\_with\_insert 3d  
 Sample\_43 4C C100 CBS no\_Hemin GFP\_negative NA hg19\_with\_insert 3d  
 Sample\_44 4C C100 CBS no\_Hemin GFP\_negative NA hg19\_with\_insert 3d  
 Sample\_45 4C EC100 CBS no\_Hemin 2xGFP\_positive NA hg19\_with\_insert 3d, 4c  
 Sample\_46 4C EC100 CBS no\_Hemin 2xGFP\_positive NA hg19\_with\_insert 3d, 4c  
 Sample\_47 4C C-0E100 GFP no\_Hemin 2xGFP\_positive NA hg19\_with\_insert 3e  
 Sample\_48 4C C-0E100 GFP no\_Hemin 2xGFP\_positive NA hg19\_with\_insert 3e  
 Sample\_49 4C C-0E100 GFP no\_Hemin 2xGFP\_positive NA hg19\_with\_insert 3e  
 Sample\_50 4C C-0E100 uLCR no\_Hemin 2xGFP\_positive NA hg19\_with\_insert 3e  
 Sample\_51 4C C-0E100 uLCR no\_Hemin 2xGFP\_positive NA hg19\_with\_insert 3e  
 Sample\_52 4C C-0E100 uLCR no\_Hemin 2xGFP\_positive NA hg19\_with\_insert 3e  
 Sample\_53 4C E100 GFP no\_Hemin 2xGFP\_positive Control\_KD hg19\_with\_insert 4a  
 Sample\_54 4C E100 GFP no\_Hemin 2xGFP\_positive SMC1A\_KD hg19\_with\_insert 4a, 4b  
 Sample\_55 4C EC100 GFP no\_Hemin 2xGFP\_positive Control\_KD hg19\_with\_insert 4a  
 Sample\_56 4C EC100 GFP no\_Hemin 2xGFP\_positive Control\_KD hg19\_with\_insert 4a  
 Sample\_57 4C EC100 GFP no\_Hemin 2xGFP\_positive SMC1A\_KD hg19\_with\_insert 4a, 4c  
 Sample\_58 4C E100 GFP no\_Hemin 2xGFP\_positive RAD21\_KD hg19\_with\_insert 4b, ext. 5  
 Sample\_59 4C noE Pos100 no\_Hemin GFP\_negative NA hg19\_with\_insert 2c, 4b, 4c, ext. 3  
 Sample\_60 4C noE Pos100 no\_Hemin GFP\_negative NA hg19\_with\_insert 2c, 4b, 4c, ext. 3  
 Sample\_61 4C E100 uLCR no\_Hemin 2xGFP\_positive SMC1A\_KD hg19\_with\_insert 4b, ext. 5  
 Sample\_62 4C E100 uLCR no\_Hemin 2xGFP\_positive RAD21\_KD hg19\_with\_insert 4b, ext. 5  
 Sample\_63 4C EC100 GFP no\_Hemin 2xGFP\_positive RAD21\_KD hg19\_with\_insert 4c, ext. 5  
 Sample\_64 4C EC100 uLCR no\_Hemin 2xGFP\_positive SMC1A\_KD hg19\_with\_insert 4c, ext. 5  
 Sample\_65 4C EC100 uLCR no\_Hemin 2xGFP\_positive RAD21\_KD hg19\_with\_insert 4c, ext. 5  
 Sample\_66 4C EC100 CBS no\_Hemin 2xGFP\_positive SMC1A\_KD hg19\_with\_insert 4c, ext. 5  
 Sample\_67 4C EC100 CBS no\_Hemin 2xGFP\_positive RAD21\_KD hg19\_with\_insert 4c, ext. 5  
 Sample\_68 4C E407 GFP no\_Hemin 2xGFP\_positive Control\_KD hg19\_with\_insert 4d, ext. 5  
 Sample\_69 4C E407 GFP no\_Hemin 2xGFP\_positive Control\_KD hg19\_with\_insert 4d, ext. 5  
 Sample\_70 4C E407 GFP no\_Hemin 2xGFP\_positive Control\_KD hg19\_with\_insert 4d, ext. 5  
 Sample\_71 4C E407 GFP no\_Hemin 2xGFP\_positive Control\_SMC1A hg19\_with\_insert 4d  
 Sample\_72 4C E407 uLCR no\_Hemin 2xGFP\_positive Control\_KD hg19\_with\_insert 4d, ext. 5  
 Sample\_73 4C E407 uLCR no\_Hemin 2xGFP\_positive Control\_KD hg19\_with\_insert 4d, ext. 5

Sample\_74 4C E407 uLCR no\_Hemin 2xGFP\_positive SMC1A\_KD hg19\_with\_insert 4d  
Sample\_75 4C E0C0C100 GFP no\_Hemin 2xGFP\_positive NA hg19\_with\_insert 4j  
Sample\_76 4C E0C0C100 GFP no\_Hemin 2xGFP\_positive NA hg19\_with\_insert 4j  
Sample\_77 4C E100C0C100 GFP no\_Hemin 2xGFP\_positive NA hg19\_with\_insert 4j  
Sample\_78 4C E100C0C100 GFP no\_Hemin 2xGFP\_positive NA hg19\_with\_insert 4j  
Sample\_79 4C E0 GFP plus\_Hemin 2xGFP\_positive NA hg19\_with\_insert 1j, ext. 2a  
Sample\_80 4C E0 GFP plus\_Hemin 2xGFP\_positive NA hg19\_with\_insert 1j, ext. 2a  
Sample\_81 4C E11 GFP plus\_Hemin 2xGFP\_positive NA hg19\_with\_insert 1j, ext. 2a  
Sample\_82 4C E11 GFP plus\_Hemin 2xGFP\_positive NA hg19\_with\_insert 1j, ext. 2a  
Sample\_83 4C E47 GFP plus\_Hemin 2xGFP\_positive NA hg19\_with\_insert 1j, ext. 2a  
Sample\_84 4C E47 GFP plus\_Hemin 2xGFP\_positive NA hg19\_with\_insert 1j, ext. 2a  
Sample\_85 4C E100 GFP plus\_Hemin 2xGFP\_positive NA hg19\_with\_insert 1j, ext. 2a  
Sample\_86 4C E100 GFP plus\_Hemin 2xGFP\_positive NA hg19\_with\_insert 1j, ext. 2a  
Sample\_87 4C E100 GFP plus\_Hemin 2xGFP\_positive NA hg19\_with\_insert 1j, ext. 2a  
Sample\_88 4C E407 GFP plus\_Hemin 2xGFP\_positive NA hg19\_with\_insert 1j, ext. 2a  
Sample\_89 4C E407 GFP plus\_Hemin 2xGFP\_positive NA hg19\_with\_insert 1j, ext. 2a  
Sample\_90 4C E407 GFP plus\_Hemin 2xGFP\_positive NA hg19\_with\_insert 1j, ext. 2a  
Sample\_91 4C E100 GFP no\_Hemin 6xGFP\_negative NA hg19\_with\_insert 1j  
Sample\_92 4C E100 GFP no\_Hemin 6xGFP\_negative NA hg19\_with\_insert 1j  
Sample\_96 4C E407 GFP no\_Hemin 9xGFP\_negative NA hg19\_with\_insert 1j  
Sample\_97 4C E407 GFP no\_Hemin 9xGFP\_negative NA hg19\_with\_insert 1j  
Sample\_98 4C E407 GFP no\_Hemin 9xGFP\_negative NA hg19\_with\_insert 1j  
Sample\_101 4C noE Pos11 no\_Hemin GFP\_negative NA hg19\_with\_insert 2c, ext. 3  
Sample\_102 4C noE Pos11 no\_Hemin GFP\_negative NA hg19\_with\_insert 2c, ext. 3  
Sample\_105 4C noE Pos47 no\_Hemin GFP\_negative NA hg19\_with\_insert 2c, ext. 3  
Sample\_106 4C noE Pos47 no\_Hemin GFP\_negative NA hg19\_with\_insert 2c, ext. 3  
Sample\_111 4C noE Pos407 no\_Hemin GFP\_negative NA hg19\_with\_insert 2d, ext. 3  
Sample\_112 4C noE Pos407 no\_Hemin GFP\_negative NA hg19\_with\_insert 2d, ext. 3  
Sample\_113 4C E11 uLCR no\_Hemin 2xGFP\_positive NA hg19\_with\_insert 2c, ext. 3  
Sample\_114 4C E11 uLCR no\_Hemin 2xGFP\_positive NA hg19\_with\_insert 2c, ext. 3  
Sample\_115 4C E47 uLCR no\_Hemin 2xGFP\_positive NA hg19\_with\_insert 2c, ext. 3  
Sample\_116 4C E47 uLCR no\_Hemin 2xGFP\_positive NA hg19\_with\_insert 2c, ext. 3  
Sample\_117 4C E407 uLCR no\_Hemin 2xGFP\_positive NA hg19\_with\_insert 2d, ext. 3  
Sample\_118 4C E407 uLCR no\_Hemin 2xGFP\_positive NA hg19\_with\_insert 2d, ext. 3  
Sample\_119 4C E407 uLCR no\_Hemin 2xGFP\_positive NA hg19\_with\_insert 2d, ext. 3  
Sample\_120 4C noE LeftBoundary no\_Hemin GFP\_negative NA hg19\_with\_insert ext. 4  
Sample\_121 4C noE LeftBoundary no\_Hemin GFP\_negative NA hg19\_with\_insert ext. 4  
Sample\_122 4C ECO LeftBoundary no\_Hemin 2xGFP\_positive NA hg19\_with\_insert ext. 4  
Sample\_123 4C ECO LeftBoundary no\_Hemin 2xGFP\_positive NA hg19\_with\_insert ext. 4  
Sample\_124 4C EC100 LeftBoundary no\_Hemin 2xGFP\_positive NA hg19\_with\_insert ext. 4  
Sample\_125 4C EC100 LeftBoundary no\_Hemin 2xGFP\_positive NA hg19\_with\_insert ext. 4  
Sample\_126 4C E0C0C100 LeftBoundary no\_Hemin 2xGFP\_positive NA hg19\_with\_insert ext. 4  
Sample\_127 4C E0C0C100 LeftBoundary no\_Hemin 2xGFP\_positive NA hg19\_with\_insert ext. 4  
Sample\_128 4C E100C0C100 LeftBoundary no\_Hemin 2xGFP\_positive NA hg19\_with\_insert ext. 4  
Sample\_129 4C E100C0C100 LeftBoundary no\_Hemin 2xGFP\_positive NA hg19\_with\_insert ext. 4  
Sample\_130 4C EC100 uLCR no\_Hemin 2xGFP\_positive Control\_KD hg19\_with\_insert ext. 5  
Sample\_131 4C EC100 GFP no\_Hemin 2xGFP\_positive Control\_KD hg19\_with\_insert ext. 5  
Sample\_132 4C EC100 GFP no\_Hemin 2xGFP\_positive Control\_KD hg19\_with\_insert ext. 5  
Sample\_133 4C EC100 uLCR no\_Hemin 2xGFP\_positive Control\_KD hg19\_with\_insert ext. 5  
Sample\_134 4C EC100 uLCR no\_Hemin 2xGFP\_positive Control\_KD hg19\_with\_insert ext. 5  
Sample\_135 4C EC100 CBS no\_Hemin 2xGFP\_positive Control\_KD hg19\_with\_insert ext. 5  
Sample\_136 4C EC100 CBS no\_Hemin 2xGFP\_positive Control\_KD hg19\_with\_insert ext. 5  
Sample\_137 4C E407 GFP no\_Hemin 2xGFP\_positive RAD21\_KD hg19\_with\_insert ext. 5  
Sample\_138 4C E407 uLCR no\_Hemin 2xGFP\_positive RAD21\_KD hg19\_with\_insert ext. 5  
Sample\_139 4C EC100 CBS no\_Hemin 2xGFP\_positive Control\_KD hg19\_with\_insert ext. 5  
Sample\_140 4C EC100 CBS no\_Hemin 2xGFP\_positive Control\_KD hg19\_with\_insert ext. 5  
Sample\_141 4C E47 GFP no\_Hemin 2xGFP\_positive NA hg19\_with\_insert 1j  
Sample\_142 4C E47 GFP no\_Hemin 2xGFP\_positive NA hg19\_with\_insert 1j  
Sample\_143 4C E100 GFP no\_Hemin 2xGFP\_positive NA hg19\_with\_insert 1j, ext. 2b  
Sample\_144 4C E100 GFP no\_Hemin 2xGFP\_positive NA hg19\_with\_insert 1j, ext. 2b  
Sample\_145 4C E407 GFP no\_Hemin 2xGFP\_positive NA hg19\_with\_insert 1j, ext. 2b  
Sample\_146 4C E407 GFP no\_Hemin 2xGFP\_positive NA hg19\_with\_insert 1j, ext. 2b  
Sample\_147 4C E100 GFP no\_Hemin 6xGFP\_negative NA hg19\_with\_insert 1j, ext. 2b, 2c  
Sample\_148 4C E100 GFP no\_Hemin 6xGFP\_negative NA hg19\_with\_insert 1j, ext. 2b, 2c  
Sample\_149 4C E407 GFP no\_Hemin 9xGFP\_negative NA hg19\_with\_insert 1j, ext. 2b, 2c  
Sample\_150 4C E407 GFP no\_Hemin 9xGFP\_negative NA hg19\_with\_insert 1j, ext. 2b, 2c  
Sample\_151 4C E407 GFP no\_Hemin 9xGFP\_negative NA hg19\_with\_insert 1j  
Sample\_152 4C E407 GFP no\_Hemin 9xGFP\_negative NA hg19\_with\_insert 1j  
Sample\_153 4C C0 LeftBoundary no\_Hemin GFP\_negative NA hg19\_with\_insert ext. 4  
Sample\_154 4C C0 LeftBoundary no\_Hemin GFP\_negative NA hg19\_with\_insert ext. 4  
Sample\_155 4C C0 LeftBoundary no\_Hemin GFP\_negative NA hg19\_with\_insert ext. 4  
Sample\_156 4C C100 LeftBoundary no\_Hemin GFP\_negative NA hg19\_with\_insert ext. 4  
Sample\_157 4C C100 LeftBoundary no\_Hemin GFP\_negative NA hg19\_with\_insert ext. 4

## Field-specific reporting

Please select the one below that is the best fit for your research. If you are not sure, read the appropriate sections before making your selection.

Life sciences  Behavioural & social sciences  Ecological, evolutionary & environmental sciences

For a reference copy of the document with all sections, see [nature.com/documents/nr-reporting-summary-flat.pdf](https://www.nature.com/documents/nr-reporting-summary-flat.pdf)

## Life sciences study design

All studies must disclose on these points even when the disclosure is negative.

|                 |                                                                                                                                                                                                                                                                                                                                                                                                     |
|-----------------|-----------------------------------------------------------------------------------------------------------------------------------------------------------------------------------------------------------------------------------------------------------------------------------------------------------------------------------------------------------------------------------------------------|
| Sample size     | No statistical method was used to predetermine sample size                                                                                                                                                                                                                                                                                                                                          |
| Data exclusions | no data were excluded from the analyses                                                                                                                                                                                                                                                                                                                                                             |
| Replication     | Number of replicates are indicated in the figure legends. All 4C and all but one ChIP-qPCR experiments represent at least two technical replicates.<br>Additionally, all conclusions are based on the analysis of multiple independent clones having the enhancer at different distances and/or having ectopic CTCF sites at different positions and/or having different cohesin subunits depleted. |
| Randomization   | the experiments were not randomized                                                                                                                                                                                                                                                                                                                                                                 |
| Blinding        | The investigators were not blinded to allocation during experiments and outcome assessment.                                                                                                                                                                                                                                                                                                         |

## Reporting for specific materials, systems and methods

We require information from authors about some types of materials, experimental systems and methods used in many studies. Here, indicate whether each material, system or method listed is relevant to your study. If you are not sure if a list item applies to your research, read the appropriate section before selecting a response.

### Materials & experimental systems

| n/a                                 | Involved in the study                                     |
|-------------------------------------|-----------------------------------------------------------|
| <input type="checkbox"/>            | <input checked="" type="checkbox"/> Antibodies            |
| <input type="checkbox"/>            | <input checked="" type="checkbox"/> Eukaryotic cell lines |
| <input checked="" type="checkbox"/> | <input type="checkbox"/> Palaeontology and archaeology    |
| <input checked="" type="checkbox"/> | <input type="checkbox"/> Animals and other organisms      |
| <input checked="" type="checkbox"/> | <input type="checkbox"/> Human research participants      |
| <input checked="" type="checkbox"/> | <input type="checkbox"/> Clinical data                    |
| <input checked="" type="checkbox"/> | <input type="checkbox"/> Dual use research of concern     |

### Methods

| n/a                                 | Involved in the study                              |
|-------------------------------------|----------------------------------------------------|
| <input checked="" type="checkbox"/> | <input type="checkbox"/> ChIP-seq                  |
| <input type="checkbox"/>            | <input checked="" type="checkbox"/> Flow cytometry |
| <input checked="" type="checkbox"/> | <input type="checkbox"/> MRI-based neuroimaging    |

## Antibodies

|                 |                                                                                                                                                                                                                                                                                                                                                                                                                                                                                                                                                                                                                                                                                                                                                                                                                                                                                                                                                                                                                                                                                                                                                                                                                                                                                                                                                                                                                                                                                                                                                                                                                                                                                                                                                                                                                                                                   |
|-----------------|-------------------------------------------------------------------------------------------------------------------------------------------------------------------------------------------------------------------------------------------------------------------------------------------------------------------------------------------------------------------------------------------------------------------------------------------------------------------------------------------------------------------------------------------------------------------------------------------------------------------------------------------------------------------------------------------------------------------------------------------------------------------------------------------------------------------------------------------------------------------------------------------------------------------------------------------------------------------------------------------------------------------------------------------------------------------------------------------------------------------------------------------------------------------------------------------------------------------------------------------------------------------------------------------------------------------------------------------------------------------------------------------------------------------------------------------------------------------------------------------------------------------------------------------------------------------------------------------------------------------------------------------------------------------------------------------------------------------------------------------------------------------------------------------------------------------------------------------------------------------|
| Antibodies used | SMC1: A300-055A, for western 1:1000, for ChIP 5ug per 30ug of chromatin, Bethyl, <a href="https://www.thermofisher.com/antibody/product/SMC1-Antibody-Polyclonal/A300-055A">https://www.thermofisher.com/antibody/product/SMC1-Antibody-Polyclonal/A300-055A</a><br>CTCF: 07-829, ChIP 5ug per 30ug of chromatin, Millipore, <a href="https://www.merckmillipore.com/NL/en/product/Anti-CTCF-Antibody,MM_NF-07-729?ReferrerURL=https%3A%2F%2Fwww.google.com%2FH3K27me3%3A%2F%2Fwww.google.com%2F">https://www.merckmillipore.com/NL/en/product/Anti-CTCF-Antibody,MM_NF-07-729?ReferrerURL=https%3A%2F%2Fwww.google.com%2FH3K27me3%3A%2F%2Fwww.google.com%2F</a><br>H3K27me3: ab6002, ChIP 5ug per 30ug of chromatin, Abcam, <a href="https://www.abcam.com/Histone-H3-tri-methyl-K27-antibody-mAbcam-6002-ChIP-Grade-ab6002.html?gclid=CjwKCAjwxOCRBhA8EiwA0X8hi4XuFW8mffpMVkwU6GjRPPeanemAtd_AXf5jc85V5YQ2EJR1ftOxJhoCL9oQAvD_BwE">https://www.abcam.com/Histone-H3-tri-methyl-K27-antibody-mAbcam-6002-ChIP-Grade-ab6002.html?gclid=CjwKCAjwxOCRBhA8EiwA0X8hi4XuFW8mffpMVkwU6GjRPPeanemAtd_AXf5jc85V5YQ2EJR1ftOxJhoCL9oQAvD_BwE</a><br>y-Tubulin: GTU-88 T6557, 1:3000, Sigma, <a href="https://www.sigmaaldrich.com/NL/en/product/sigma/t6557">https://www.sigmaaldrich.com/NL/en/product/sigma/t6557</a><br>goat anti rabbit HRP: #7074, 1:3000, Cell Signalling, <a href="https://www.cellsignal.com/products/secondary-antibodies/anti-rabbit-igg-hrp-linked-antibody/7074">https://www.cellsignal.com/products/secondary-antibodies/anti-rabbit-igg-hrp-linked-antibody/7074</a><br>goat anti mouse HRP: #7076, 1:3000, Cell, Signalling, <a href="https://www.cellsignal.com/products/secondary-antibodies/anti-mouse-igg-hrp-linked-antibody/7076">https://www.cellsignal.com/products/secondary-antibodies/anti-mouse-igg-hrp-linked-antibody/7076</a> |
| Validation      | Antibody validation can be found on manufacturers website as indicated.                                                                                                                                                                                                                                                                                                                                                                                                                                                                                                                                                                                                                                                                                                                                                                                                                                                                                                                                                                                                                                                                                                                                                                                                                                                                                                                                                                                                                                                                                                                                                                                                                                                                                                                                                                                           |

## Eukaryotic cell lines

Policy information about [cell lines](#)

|                                                                      |                                                                                                                                                         |
|----------------------------------------------------------------------|---------------------------------------------------------------------------------------------------------------------------------------------------------|
| Cell line source(s)                                                  | Human erythroleukemia K562 cells were used in this study (not authenticated cell line, available in our institute, periodically tested for mycoplasma). |
| Authentication                                                       | K562 cells were not authenticated.                                                                                                                      |
| Mycoplasma contamination                                             | K562 cells were regularly testes for mycoplasma.                                                                                                        |
| Commonly misidentified lines<br>(See <a href="#">ICLAC</a> register) | No commonly misidentified cell lines were used.                                                                                                         |

## Flow Cytometry

### Plots

Confirm that:

- The axis labels state the marker and fluorochrome used (e.g. CD4-FITC).
- The axis scales are clearly visible. Include numbers along axes only for bottom left plot of group (a 'group' is an analysis of identical markers).
- All plots are contour plots with outliers or pseudocolor plots.
- A numerical value for number of cells or percentage (with statistics) is provided.

### Methodology

|                           |                                                                                                                                                                                                                                                                                                                                                                                                                                                                                                                                                                                                                                                            |
|---------------------------|------------------------------------------------------------------------------------------------------------------------------------------------------------------------------------------------------------------------------------------------------------------------------------------------------------------------------------------------------------------------------------------------------------------------------------------------------------------------------------------------------------------------------------------------------------------------------------------------------------------------------------------------------------|
| Sample preparation        | For flow cytometry analysis, genetically modified K562 cells were cultured as indicated in methods section and either treated with or without hemin two days prior to analysis. Cells were transferred to a 96-wells plate for flow cytometry analysis directly from the culture dish. For every experiment, at least 10,000 cells within the live single-cell gate were recorded. For fluorescence assisted cell sorting, 10 million cells were collected, centrifuged and resuspended in 1 mL of culture medium.                                                                                                                                         |
| Instrument                | Flow cytometry analysis: Cytotflex S, Beckman Coulter Inc. Model No.: B75442<br>Fluorescence assisted cell sorting: FACS Aria Fusion, Beckman Coulter Inc. Special Order Research Product                                                                                                                                                                                                                                                                                                                                                                                                                                                                  |
| Software                  | Flow cytometry analysis: CytExpert 2.3.0.84<br>Fluorescence assisted cell sorting: FACSDiva 8.0.1, Beckman Coulter Inc.                                                                                                                                                                                                                                                                                                                                                                                                                                                                                                                                    |
| Cell population abundance | We used identical gate settings to separate GFP (or dsRed) positive and negative cells for all experiments, as described in the manuscript.                                                                                                                                                                                                                                                                                                                                                                                                                                                                                                                |
| Gating strategy           | For flow cytometry analysis and fluorescence assisted cell sorting, cells were gated for live single cells based on FSC-A, SSC-A and FSC-H.<br>For sorting, cells were considered GFP positive based on gating on "noE" cell line. Gates were drawn such that more than 99.9% of "noE" cells felt into the GFP-negative gate.<br>To enrich for KRAB::BFP containing cells prior to knock-down experiments, cells were gated for BFP positive. From this population, the top 50% BFP expressing cells were sorted.<br>For analysis of knock-down experiments, cells were gated to be BFP/sgRNA positive as compared to cells that only contained KRAB::BFP. |

- Tick this box to confirm that a figure exemplifying the gating strategy is provided in the Supplementary Information.
