# Supplementary material for: Building regulatory landscapes reveals that an enhancer can recruit cohesin to create contact domains, engage CTCF sites and activate distant genes
Source: PubMed Central journal article supplement (PMC9205769; doi:10.1038/s41594-022-00787-7), 2022-06-16
Supplement: 41594_2022_787_MOESM4_ESM.pdf [file 41594_2022_787_MOESM4_ESM.pdf]

SMC1A antibody (rabbit, Bethyl A300-055A, 1:1000)

Blot 1: E0-E100

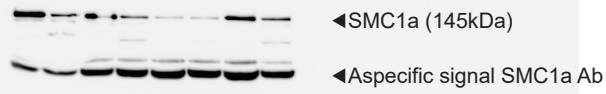

Blot 2: E407

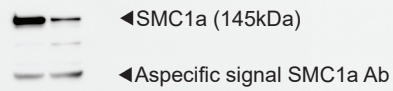

gTubulin (GTU-88) antibody (mouse, Sigma #T6557, 1:1000)

Blot 1: E0-E100  
(stripped)

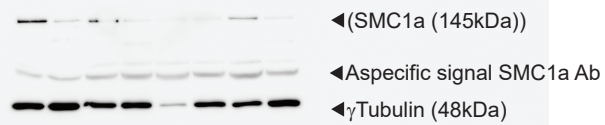

Blot 2: E407  
(stripped)

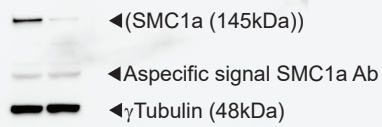

**Source Data Fig. 1 | Unprocessed SMC1A immunoblot scan**

Unprocessed scans corresponding to main figure 5c. Upper scan are two blots stained for SMC1A, lower scan shows same blots, stripped and stained for  $\gamma$ Tubulin. SMC1A and  $\gamma$ Tubulin bands are indicated. Gel1 (top) contains from left to right: E0 control KD (C), E0 SMC1A knockdown (KD), E11 C, E11 KO, E47 C, E47 KO, E100 C, E100 KO. Gel2 (bottom) contains E407 C and E407 KO.
